# Supplementary material for: Are all thermometers equal? A study of three infrared thermometers to detect fever in an African outpatient clinic
Source: PeerJ. 2022 Jun 15;10:e13283. doi: 10.7717/peerj.13283 (PMC9206434; doi:10.7717/peerj.13283)
Supplement: Data S1 [file peerj-10-13283-s001.xlsx]

## Sheet: Raw data
SN	Age	Sex	Head covering	Oral	Tympanic	TAT	Forehead non-contact
1	55	M	No	37	37.2	37.2	36.6
2	38	M	No	36.7	37.1	37.5	36.8
3	39	M	No	36.4	37	36.2	36.3
4	32	M	No	37	37	37	36.3
5	58	M	No	37.3	37	38	38
6	30	M	No	36.9	37.5	37.4	37.4
7	26	F	Yes	36.7	37	36.3	36
8	40	F	Yes	37.2	38.1	37.9	36.4
9	25	F	Yes	36.9	37.2	37.2	36.3
10	37	F	Yes	37.2	37.3	37.3	36.7
11	47	F	Yes	37.1	37	37	36.3
12	33	F	No	38.3	38.5	39	37
13	20	F	Yes	37.2	37.9	37.3	36.6
14	23	F	Yes	36.8	37.2	37	36.9
15	28	F	Yes	37	37.6	37.3	36.5
16	20	F	Yes	36.7	38.9	38.9	36.5
17	22	F	Yes	36.9	37.7	37.4	36.5
18	20	M	No	37.4	38.3	37.9	36.7
19	27	M	No	37.7	38.3	38.2	36.7
20	42	M	No	36.9	36.9	37.2	36.3
21	20	M	No	37.2	38	37.4	36.7
22	20	M	No	37.1	38.6	38.5	37.9
23	50	M	No	38.6	39.6	39.8	38
24	42	M	No	37	37.6	37	36.3
25	35	M	No	37	37	37.5	37.2
26	44	F	Yes	37.1	36.7	37.8	37.7
27	75	M	No	36.9	37	37.3	36.7
28	40	M	No	36.9	37.5	37.5	36.7
29	30	M	No	36.6	37	37.3	37
30	29	M	No	36.7	36.9	37.4	37.6
31	20	M	No	36.5	37	37	37.2
32	20	M	No	36.9	38.4	37.7	37.1
33	20	M	No	36.6	37.6	37.6	37.7
34	27	F	Yes	36.4	38.4	38	37.1
35	35	F	No	37.7	38.3	36.4	36.4
36	35	F	Yes	36.2	37.3	36.7	36.5
37	44	F	No	36.9	38.3	37.7	36.7
38	23	F	Yes	37	38.2	37.5	36.6
39	35	F	No	37.1	38.3	37.9	36.7
40	60	M	No	37	37.4	37.7	37.4
41	32	M	No	36.7	36.9	37.4	37.3
42	46	M	No	36.8	37.1	37.5	37.2
43	35	M	No	36.3	37.1	36.9	37.1
44	50	M	No	37	37.6	37.6	37.5
45	20	M	No	37.1	37	37.8	37.7
46	23	M	No	36.8	37.3	37.4	36.9
47	22	F	Yes	36.4	38.2	37.6	36.5
48	25	F	Yes	37	38.2	37.8	36.5
49	40	F	Yes	36.7	37.5	37.4	36.3
50	50	F	Yes	36.9	37.2	36.2	36.3
51	25	F	Yes	36.9	37.1	37.3	36.3
52	28	F	Yes	37	37.2	37.3	36.6
53	44	F	No	37.5	38.6	37.4	37
54	26	F	Yes	36.9	38	37.3	36.6
55	32	F	Yes	37.2	38.1	38.3	37.3
56	18	F	Yes	37.1	38.1	37.4	36.5
57	32	F	No	37	38.1	37.5	36.7
58	32	F	No	37	37.1	37.5	36.8
59	28	F	Yes	37	37.2	37.2	37.5
60	38	F	No	37.1	38.2	37.1	36.4
61	40	F	Yes	37.7	37.6	38.1	36.7
62	29	F	Yes	36.9	37.9	37.6	36.8
63	30	F	Yes	36.9	36.1	37.7	37.6
64	25	F	Yes	36.9	38	37.1	36.6
65	30	M	No	37.3	36.4	38	37.3
66	20	M	No	37	37.6	37.7	36.7
67	21	M	No	37	37.5	37.6	36.9
68	23	M	No	38.8	38.6	39.2	37.6
69	50	M	No	36.8	37	37.8	37.5
70	55	M	No	37.4	36.9	37.7	37.5
71	58	M	No	36.8	37	37	36.5
72	30	F	Yes	36.7	37.5	37.4	36.7
73	65	F	No	37	37.7	38	36.6
74	40	M	No	37.7	37.4	37.7	37
75	42	M	No	36.4	37.2	36.9	36.6
76	68	M	No	36.3	37.1	37.1	37.3
77	45	F	Yes	39.4	37.3	38.2	36.6
78	30	F	Yes	36.9	37.7	37.7	38
79	23	F	Yes	37.1	38	38.2	38
80	22	F	Yes	37.2	37.9	38.1	36.4
81	40	F	Yes	37.2	37.6	37	36.2
82	55	F	Yes	37	37	37.6	37
83	20	F	No	36.9	37.7	37.3	36.6
84	32	F	No	37.4	37.1	36.9	36.4
85	19	F	No	37.5	38.2	37.7	36.7
86	30	M	No	36.5	36.9	37.5	36.7
87	40	M	No	36.9	38.1	37.1	36.4
88	40	M	No	36.5	37.2	37.3	36.9
89	24	M	No	36.7	37.3	37.2	36.7
90	50	M	No	36.8	39.2	39	38
91	31	M	No	36.8	37.4	37.3	37.1
92	23	M	No	37	36.8	37.1	36.7
93	60	M	No	36.4	37	37.3	37.2
94	18	M	No	36.9	37	37.5	37.3
95	45	F	No	36.9	37.3	37.8	36.8
96	45	F	No	37	37.9	38.2	37.1
97	35	F	Yes	36.7	37.8	37.1	36.7
98	65	F	No	37	37.5	37.9	37
99	30	F	No	37	37.3	37.6	37.6
100	30	F	No	37.2	38.4	37.4	37.1
101	25	F	Yes	36.4	38.1	36.9	36.5
102	60	F	No	37.1	38	37.8	36.7
103	43	F	Yes	36.8	38	37.4	36.7
104	20	F	No	37.2	37.6	37.4	36.7
105	80	M	No	36.9	37.6	37.9	37
106	50	M	No	37.4	37.6	37.9	37.9
107	57	M	No	37.1	37	37.4	36.4
108	35	M	No	37	37.3	37.8	36.8
109	23	M	No	36.7	36.9	36.9	36.5
110	22	M	No	36.9	36.9	36.9	36.3
111	70	M	No	37	37	37.6	37.2
112	23	M	No	39.3	38.9	39	37.3
113	45	M	No	37.5	38.8	38.5	38.4
114	25	M	No	36.8	37.1	37.7	37.6
115	20	F	Yes	36.4	37.5	37.5	36.7
116	28	F	No	37	37	36.4	36.4
117	34	F	No	36.8	37.3	37.7	37.2
118	38	F	Yes	37.3	37.4	37.6	36.7
119	50	F	No	36.7	37.1	37.3	36.4
120	60	F	No	36.3	37.8	37.7	37.3
121	30	F	No	37.2	37.9	38.4	37.9
122	44	F	Yes	37	37.7	37.6	37.4
123	40	F	Yes	36.6	36.1	37.4	37.3
124	80	F	No	36.6	37.6	38	37.2
125	20	M	No	37	37.8	37.5	36.4
126	35	M	No	37.5	37.5	37.2	36.3
127	27	M	No	36.9	37	37	36.4
128	22	M	No	36.9	37.3	37.7	37.5
129	25	M	No	37	36.9	37.7	37.5
130	70	F	No	36.8	37.1	37.6	36.7
131	30	F	No	36.8	37.8	37.3	36.3
132	45	F	No	37	37.8	38	37.2
133	67	F	No	37	37.1	37.7	36.6
134	20	M	No	36.9	36.5	37.8	37.6
135	27	M	No	36.9	38.7	37.5	37.2
136	25	M	No	37.1	37.1	37.4	37.6
137	32	M	No	36.8	37.7	37.2	36.7
138	29	M	No	37.2	37.1	37	36.4
139	70	F	No	36.8	37.1	37.6	36.7
140	30	F	No	36.8	37.8	37.3	36.3
141	45	F	No	37	37.8	38	37.2
142	67	F	No	37	37.1	37.7	36.6
143	25	F	Yes	37.1	37.4	37.1	36.6
144	18	F	Yes	37.1	31.5	37.5	37.2
145	25	F	Yes	37	38.1	37.4	36.5
146	35	F	Yes	37	37.6	36.7	36.7
147	21	F	No	37	37.2	37.6	36.7
148	20	F	Yes	36.7	38.3	37.8	36.6
149	82	M	No	36.8	37.1	36.8	36.6
150	21	M	No	37.1	37.8	37.3	36.7
151	28	M	No	37	36.9	37.7	37
152	28	M	No	37	37.7	37.5	36.8
153	18	M	No	37.8	37	37.7	37
154	54	M	No	37.1	38.4	36.9	36.7
155	57	M	No	36.9	37.7	37.3	36.5
156	55	M	No	37.1	37.8	37	36.7
157	47	M	No	36.8	37.6	37.3	37.3
158	19	M	No	36.9	37.1	37.7	36.7
159	19	F	No	37.4	38.1	37.5	36.9
160	18	F	Yes	37	38.2	37.7	37.2
161	21	F	Yes	37	37.6	36.9	37.1
162	25	F	Yes	37	37.7	36	36.3
163	45	F	No	37	37.8	36.8	36.6
164	60	F	No	37.5	37.3	36.3	36.6
165	45	M	No	37.1	38.1	37.2	38.1
166	66	M	No	36.8	36.6	36.9	38.4
167	72	M	No	37.1	37.8	37.4	36.7
168	25	M	No	37	37	37.5	36.7
169	25	M	No	37.1	37.1	37.6	36.7
170	70	M	No	37.8	37.6	38.1	37.6
171	75	M	No	38.9	36.9	36.7	36.8
172	35	M	No	37.5	37.9	38.2	37.8
173	70	M	No	36.9	37.1	37.3	37.2
174	70	M	No	37.2	37.3	37.8	37.6
175	40	F	No	36.9	37.5	37.5	36.6
176	50	F	Yes	37.4	37.8	37.4	37.4
177	40	F	No	37.9	38.1	38.1	37.8
178	42	F	Yes	37.5	37.1	37.2	36.7
179	40	F	Yes	37.2	37.9	36.4	36.6
180	33	F	Yes	37.7	38.2	37.1	36.7
181	80	F	Yes	37	37.7	37.5	37
182	55	F	Yes	37.3	38	39.5	37.5
183	75	F	Yes	36.7	37.2	36.7	36.7
184	55	F	Yes	36.9	37.1	37.5	36.8
185	55	F	Yes	37.6	37.9	36.8	37.1
186	54	F	Yes	38.1	38	38.2	36.7
187	65	F	No	37.7	37.6	37.4	37.5
188	46	M	No	36.9	37.1	36.8	36.4
189	45	M	No	37.1	37.3	37.7	36.8
190	50	M	No	37.8	38.1	38.1	37.3
191	18	M	No	39.2	40	39.9	36.7
192	21	M	No	36.9	37.6	37.5	37
193	56	M	No	37.1	37.6	37.1	36.8
194	27	M	No	36.2	37.5	37.5	36.4
195	30	M	No	36.3	37.6	37.2	36.5
196	60	M	No	36.7	37.6	37.6	36.8
197	48	M	No	36.1	37.1	37.5	36.4
198	46	M	No	37.2	37.5	36.6	37.1
199	55	M	No	35.6	37.1	37.4	36.7
200	35	M	No	36.1	36.9	37.3	36.8
